# Supplementary material for: Humic Substances Isolated from Recycled Biomass Trigger Jasmonic Acid Biosynthesis and Signalling
Source: MDPI journal article supplement (doi:10.3390/plants12173148), 2023-09-01
Supplement: s1 [file s1]

Supplementary File Table S1: Primers used in this study.

| Gene  | Nomenclature                            | GenBank            | Primer (5' to 3')       | N° bases | Temperature°C |
|-------|-----------------------------------------|--------------------|-------------------------|----------|---------------|
| PDLa3 | Phospholipase D alpha                   | Solyc08g066800.2   | GTTACTGCCTTTGCACGTTT    | 20       | 57.51         |
|       |                                         |                    | TGGAAATTGTACGTTTCGACA   | 20       | 57.35         |
| LOX2S | Lipoxygenase 2                          | Solyc01g006540     | GCCACCAATAGATGATAAACCTC | 23       | 57.05         |
|       |                                         |                    | CAATGAGTTCTTAGCCAGTGAC  | 22       | 57.06         |
| OPR3  | 12-oxiphytodienoate reductase 3         | Solyc07g007870.2   | CTCCACAGTCCACCATTTCAT   | 20       | 57.20         |
|       |                                         |                    | GGAGAGAAAAGGGGATTGTT    | 20       | 58.69         |
| AOS2  | Allene oxide synthase 2                 | Solyc11g069800.1   | CGAGTTGATCCTCCGGTAGC    | 20       | 59.97         |
|       |                                         |                    | CCCGGCCCGGTCAAAAATTTT   | 20       | 59.98         |
| MYC2  | Transcription factor                    | Solyc08g076930.1   | CAGTTTTGCCTTCTTCGGGC    | 20       | 60.04         |
|       |                                         |                    | TTCGCTGGCTTTCTACCTCG    | 20       | 60.11         |
| ARF6a | Auxin response factors                  | Solyc00g196060.2   | TGACGACAGGATGGAGTGTG    | 20       | 59.40         |
|       |                                         |                    | GGCACGTCGTATCCCCAAA     | 19       | 60.08         |
| ARF8a | Auxin response factors                  | Solyc02g037530.2   | CTGCTCAAACCCAAATGCTGTC  | 22       | 60.61         |
|       |                                         |                    | GGTAAGTGTGTTGGTGAGCCTG  | 22       | 61.39         |
| JAR1  | Jasmonoyl-isoleucine synthetase         | Solyc10g011660.2.1 | AGGAAAATCTCGTAGGCGTG    | 20       | 57.70         |
|       |                                         |                    | TCTGTAACGATATAAACCTGCG  | 22       | 58.10         |
| JAZ   | Jasmonate ZIM Domain-containing protein | Solyc11g011030.2   | CTAAAGGAGCACTTGCTATGG   | 21       | 56.49         |
|       |                                         |                    | CCAATGAACGCTTGACGA      | 18       | 57.34         |

|        |                               |                |                       |    |       |
|--------|-------------------------------|----------------|-----------------------|----|-------|
| ETR    | Etileno response sensor (ETR) | Solyc06g053710 | CTGGTTCAGTTGATGCAAGG  | 20 | 57.00 |
|        |                               |                | ACACCTTGGAGGAGTGAG    | 18 | 56.97 |
| CEVI57 | Proteinase inhibitor II       | Solyc06g053711 | TCCTAACATTTGCCCCTCATA | 21 | 58.39 |
|        |                               |                | TCCTTCACACACAAACTCTCC | 21 | 57.81 |
| ACT4   | Actin (endogenous control)    | Solyc06g053712 | GGTCCCTCTATTGTCCACAG  | 20 | 57.01 |
|        |                               |                | TGCATCTCTGGTCCAGTAGGA | 21 | 59.99 |
